# Supplementary material
Source: PubMed Central journal article supplement (PMC4437811)
Supplement: NIHMS685933-supplement-supplement_1.pdf [file NIHMS685933-supplement-supplement_1.pdf]

Supplemental Figure I: Distribution of scores for cognitive/behavioral quantitative traits described in Tables III and IV of the main text. Domains 1 to 7 are derived from principal components analyses, and are shown as sum scores, while domains 8 and 9 are scale scores.

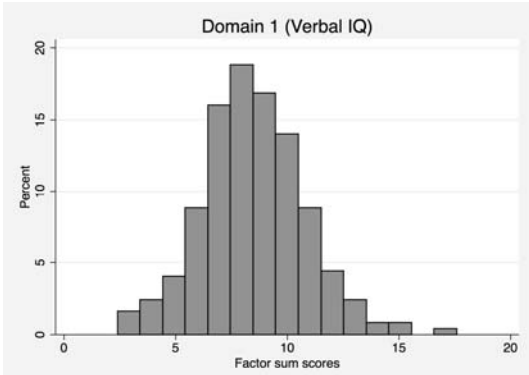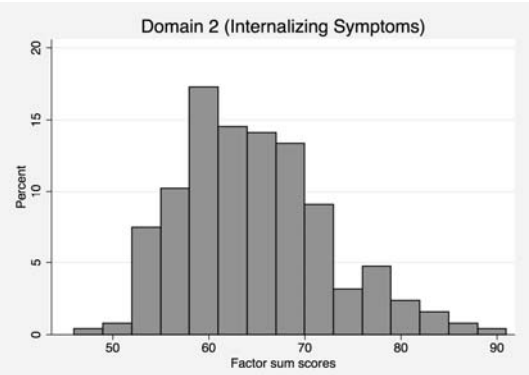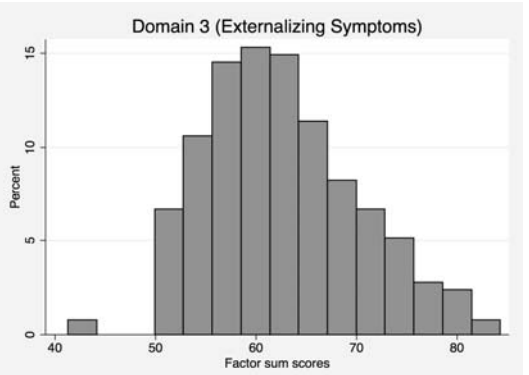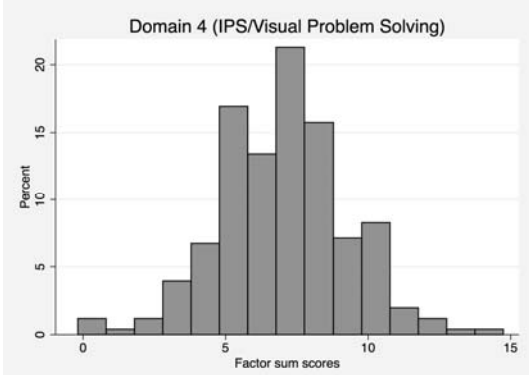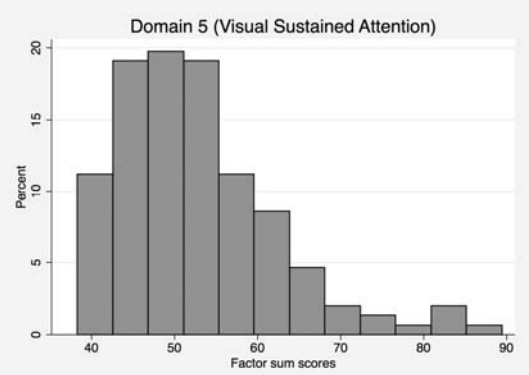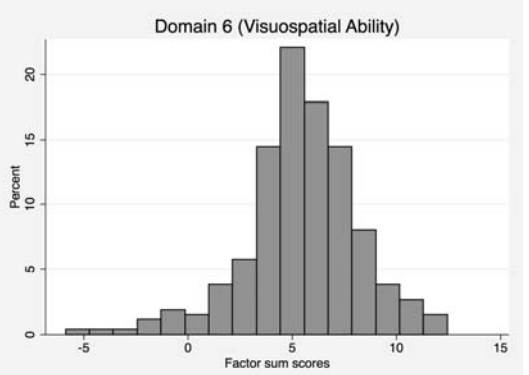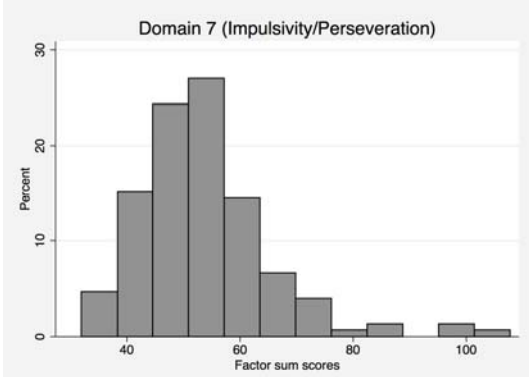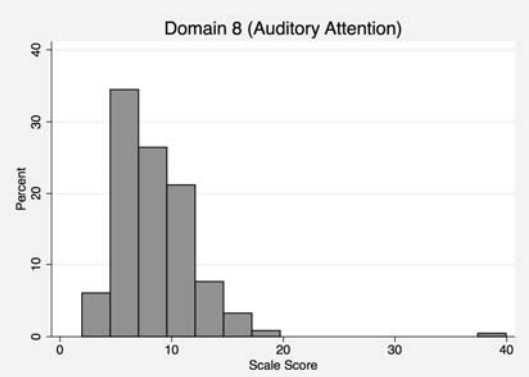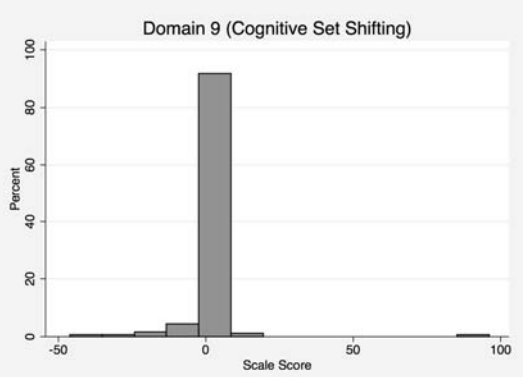

Supplemental Data

| Assessment Tool                             | Variable                         | ADHD         | Unaffected   | T, p value              |
|---------------------------------------------|----------------------------------|--------------|--------------|-------------------------|
| CBCL                                        | Anxious/depressed T score        | 63.7 (9.2)   | 60.5 (10.6)  | -1.52, 0.13             |
|                                             | Withdrawn/depressed T score      | 61.7 (10.8)  | 63 (10.1)    | -0.67, 0.50             |
|                                             | Somatic complaints T score       | 63.5 (9.7)   | 58.9 (7.5)   | <b>2.12, 0.03</b>       |
|                                             | Social problems T score          | 63.8 (9.7)   | 57.6 (7.1)   | <b>-2.76, 0.006</b>     |
|                                             | Thought problems T score         | 61.2 (10.3)  | 56.0 (5.0)   | <b>2.27, 0.02</b>       |
|                                             | Attention problems T score       | 70.1 (11.1)  | 537. (6.0)   | <b>4.07, &lt;0.0001</b> |
|                                             | Rule breaking behavior T score   | 61.3 (7.9)   | 54.4 (5.0)   | <b>3.57, 0.0001</b>     |
|                                             | Aggressive behavior T score      | 65.2 (9.7)   | 56.0 (6.1)   | <b>4.13, &lt;0.0001</b> |
| ROCFT                                       | Immediate Recall scale score     | 11.7 (7.7)   | 15.4 (8.9)   | <b>2.25, 0.03</b>       |
| TMT                                         | TMT B z score/TMT A z score      | 0.32 (8.9)   | 0.25 (0.96)  | 0.67, 0.50              |
| WISC Verbal<br>Comprehension Domain         | Information scale score          | 8.1 (3.0)    | 9.1 (2.9)    | -1.62, 0.11             |
|                                             | Similarities scale score         | 9.1 (3.4)    | 10.1 (3.0)   | -1.82, 0.07             |
|                                             | Vocabulary scale score           | 9.2 (3.1)    | 9.1 (2.7)    | -0.10, 0.92             |
|                                             | Comprehension scale score        | 8.1 (3.4)    | 8.7 (3.5)    | -0.77, 0.44             |
| WISC Perceptual<br>Organization Domain      | Picture Completion scale score   | 9.4 (3.0)    | 9.7 (2.8)    | -0.36, 0.72             |
|                                             | Picture Arrangement scale score  | 7.8 (3.4)    | 9.3 (3.2)    | <b>-2.04, 0.04</b>      |
|                                             | Block Design scale score         | 8.9 (3.4)    | 10.3 (3.8)   | -1.77, 0.08             |
| WISC Freedom from<br>Distractibility Domain | Digit Span scale score           | 8.8 (3.6)    | 9.7 (3.1)    | -1.12, 0.27             |
|                                             | Arithmetic scale score           | 8.0 (2.6)    | 8.6 (2.7)    | -1.07, 0.29             |
| WISC Processing Speed<br>Domain             | Symbol Search scale score        | 8.1 (2.9)    | 9.0 (3.0)    | -1.59, 0.11             |
|                                             | Coding scale score               | 7.8 (3.1)    | 8.3 (2.9)    | -0.94, 0.35             |
| Stroop                                      | Interference z score             | -0.005 (.99) | -0.11 (1.15) | 0.63, 0.53              |
| CPT                                         | Perseveration T score            | 56.6 (18.5)  | 49.7 (5.7)   | 1.00, 0.32              |
|                                             | Hit rate T score (reaction time) | 52.3 (11.0)  | 57.1 (11.4)  | -1.18, 0.24             |
|                                             | Errors of omission T score       | 52.8 (10.8)  | 67.2 (34.6)  | <b>-2.65, 0.008</b>     |
|                                             | Errors of commission T score     | 50.8 (9.8)   | 41.8 (16.9)  | <b>2.20, 0.03</b>       |

Supplemental Table I: Variables used in the principal components analysis, and impairment rates for ADHD-affected and unaffected participants.
